# Supplementary material
Source: Research Square preprint supplement (doi:10.21203/rs.3.rs-10082747/v1)
Supplement: Supplementary file 1 [file 47c7328849019fb6dbd956b6.docx]

**Supplementary File 3**

**Table S1 Gender- and age-stratified logistic regression analyses of time-of-response variation in loneliness reports using ONS Direct Measure.**

| **Subgroups** | |  | **Baseline model** | **Adjusted model** |
| --- | --- | --- | --- | --- |
| **Gender** | **Male**  **(N=47,539 VS 8150)** | Cos24 | 0.01  (-0.03~0.03)  P=0.963 | 0.02  (-0.03,0.08)  P=0.659 |
| Sin24 | -0.12***  (-0.15~-0.08)  P<0.001 | -0.12*  (-0.23~-0.01)  P=0.029 |
| Joint significance | P<0.001 | p=0.0874 |
| **Female**  **(N=77,155 VS 11,576)** | Cos24 | 0.01  (-0.02~0.03)  P=0.608 | 0.02  (-0.05,0.09)  P=0.589 |
| Sin24 | -0.05**  (-0.08~-0.02)  P=0.001 | -0.12*  (-0.21~-0.03)  P=0.012 |
| Joint significance | P=0.0048 | p=0.0404 |
| **Age** | **Under 60**  **(N=115,373 VS 11,122)** | Cos24 | -0.0008  (-0.02~0.02)  P=0.935 | -0.01  (-0.10~0.07)  P=0.744 |
| Sin24 | -0.09***  (-0.11~-0.06)  P<0.001 | -0.05  (-0.15~-0.05)  P=0.310 |
| Joint significance | P<0.0001 | P=0.4622 |
| **Above 60 (N=10,590 VS 8,704)** | Cos24 | 0.04  (-0.02~0.10)  P=0.187 | 0.07  (-0.01~0.15)  P=0.081 |
| Sin24 | -0.17***  (-0.25~-0.09)  P<0.001 | -0.19***  (-0.29~-0.09)  P<0.001 |
| Joint significance | P=0.0001 | P=0.008 |

Notes: 1) *P<0.05, **P<0.01, ***P<0.001. Coef., coefficient. 2) Sample sizes vary slightly between the ONS Direct Measure and UCLA-3 because valid responses were not available for exactly the same respondents. Subgroup denominators are therefore measure-specific.

Table S1 summarises gender- and age-stratified harmonic regression analyses using the ONS Direct Measure. Adjusted evidence was stronger among women and respondents aged 60 years and above than among men and respondents aged under 60 years.

The subgroup findings in Table S1 should be interpreted as exploratory because multiple subgroup comparisons were conducted.

Full coefficient estimates, confidence intervals, and joint tests are shown in Table S1.

Overall, Table S1 suggests that demographic differences may influence the robustness of the time-of-response association.

**Table S2 Partner- and education-stratified logistic regression analyses of time-of-response variation in loneliness reports using ONS Direct Measure.**

| **Subgroups** | |  | **Baseline model** | **Adjusted model** |
| --- | --- | --- | --- | --- |
| **Partner** | **Partnered**  **(N=34,903 VS 9,647)** | Cos24 | 0.03*  (0.002, 0.07)  P=0.039 | 0.02  (-0.06,0.09)  P=0.680 |
| Sin24 | -0.15***  (-0.20, -0.11)  P<0.001 | -0.15**  (-0.24~-0.06)  p=0.001 |
| Joint significance | P<0.001 | p=0.0055 |
| **Not Partnered**  **(N=28,422 VS 9,635)** | Cos24 | 0.01  (-0.04~0.06)  P=0.691 | 0.03  (-0.06,0.12)  P=0.585 |
| Sin24 | -0.09**  (-0.15~-0.03)  P=0.005 | -0.04  (-0.15~0.07)  P=0.475 |
| Joint significance | P=0.0149 | p=0.7341 |
| **Education** | **Secondary**  **(N=17,679 VS 4,163)** | Cos24 | 0.02  (-0.03~0.07)  P=0.413 | 0.07  (-0.05~0.20)  P=0.234 |
| Sin24 | -0.16***  (-0.23~-0.09)  P<0.001 | -0.26**  (-0.43~-0.08)  P=0.004 |
| Joint significance | P<0.0001 | P=0.0166 |
| **College (N=18,925 VS 4,797)** | Cos24 | 0.02  (-0.03~0.07)  P=0.396 | -0.01  (-0.13~0.11)  P=0.924 |
| Sin24 | -0.08**  (-0.15~-0.02)  P=0.007 | -0.08  (-0.23~0.06)  P=0.274 |
| Joint significance | P=0.0256 | P=0.4686 |
| **University or higher (N=28,275 VS 10,866)** | Cos24 | -0.02  (-0.06~0.02)  P=0.305 | 0.02  (-0.06~0.09)  P=0.683 |
| Sin24 | -0.11***  (-0.16~-0.07)  P<0.001 | -0.10*  (-0.19~-0.003)  P=0.043 |
| Joint significance | P<0.0001 | P=0.1231 |
| **Employment** | **Unemployed**  **(N=31,516 VS 8,993)** | Cos24 | 0.04*  (0.003~0.08)  P=0.036 | 0.09*  (0.01~0.18)  P=0.028 |
| Sin24 | -0.12***  (-0.17~-0.08)  P<0.001 | -0.22**  (-0.33~-0.11)  P<0.001 |
| Joint significance | P<0.0001 | P=0.0004 |
| **Employed**  **(N=30,400 VS 10,237)** | Cos24 | -0.03  (-0.07~0.01)  P=0.131 | -0.03  (-0.11~0.05)  P=0.476 |
| Sin24 | -0.08**  (-0.13~-0.03)  P=0.001 | -0.02  (-0.12~-0.07)  P=0.616 |
| Joint significance | P=0.0001 | P=0.5679 |

Notes: 1) *P<0.05, **P<0.01, ***P<0.001. Coef., coefficient. 2) Sample sizes vary slightly between the ONS Direct Measure and UCLA-3 because valid responses were not available for exactly the same respondents. Subgroup denominators are therefore measure-specific.

Table S2 summarises partner-, education-, and employment-stratified analyses using the ONS Direct Measure. Adjusted evidence was retained among partnered respondents, respondents with secondary education, and unemployed respondents.

Associations among respondents without a partner, those with college-level or university-level education, and employed respondents were attenuated after adjustment.

Full subgroup-specific estimates are shown in Table S2.

Among respondents with college-level education, the harmonic terms were jointly significant in the baseline model, p=0.0256, with a negative sine coefficient. However, after covariate adjustment, the joint test was no longer statistically significant,p=0.4686, and the sine coefficient was attenuated. This suggests that the baseline time-of-response association in this subgroup was not retained after adjustment.

The education-stratified results suggest heterogeneity, but evidence was not uniform after covariate adjustment.

Employment-stratified results suggested a more robust adjusted association among unemployed respondents than among employed respondents.

These subgroup results are exploratory and should not be interpreted as confirmatory evidence of effect modification.

Overall, Table S2 suggests that partnership, education, and employment may be associated with variation in the robustness of time-of-response associations.

**Table S3 Disability- and long-term health conditions-stratified logistic regression analyses of time-of-response variation in loneliness reports using ONS Direct Measure.**

| **Subgroups** | |  | **Baseline model** | **Adjusted model** |
| --- | --- | --- | --- | --- |
| **Disability** | **Disability**  **(N=23,211 VS 3,149)** | Cos24 | -0.02  (-0.03~0.03)  P=0.446 | -0.10  (-0.27,0.07)  P=0.263 |
| Sin24 | -0.14***  (-0.20 ~-0.07)  P<0.001 | -0.28*  (-0.51~-0.05)  P=0.017 |
| Joint significance | P=0.0001 | p=0.0051 |
| **No disability**  **(N=87,915 VS 15,900)** | Cos24 | -0.01  (-0.03~0.02)  P=0.648 | 0.04  (-0.02,0.10)  P=0.164 |
| Sin24 | -0.10***  (-0.12~-0.07)  P<0.01 | -0.10*  (-0.17~-0.02)  P=0.010 |
| Joint significance | P<0.0001 | p=0.0309 |
| **Long term health conditions** | **With long-term health conditions**  **(N=57,251 VS 8,255)** | Cos24 | -0.01  (-0.04~0.02)  P=0.360 | 0.01  (-0.08~0.11)  P=0.760 |
| Sin24 | -0.07  (-0.11~-0.03)  P<0.001 | -0.14  (-0.26~-0.03)  P=0.018 |
| Joint significance | P=0.0001 | P=0.0521 |
| **Without long-term health conditions**  **(N=54,484 VS 10,881)** | Cos24 | 0.003  (-0.02~0.03)  P=0.855 | 0.02  (-0.05~0.09)  P=0.565 |
| Sin24 | -0.12***  (-0.15~-0.08)  P<0.001 | -0.09*  (-0.18~-0.001)  P=0.047 |
| Joint significance | P<0.0001 | P=0.1376 |

Notes: 1) *P<0.05, **P<0.01, ***P<0.001. Coef., coefficient. 2) Sample sizes vary slightly between the ONS Direct Measure and UCLA-3 because valid responses were not available for exactly the same respondents. Subgroup denominators are therefore measure-specific.

Table S3 summarises disability- and long-term health-condition-stratified analyses using the ONS Direct Measure. Adjusted evidence was retained among respondents with and without disability and among those with long-term health conditions.

The adjusted association appeared stronger among respondents with disability than among those without disability.

For long-term health conditions, evidence was stronger among respondents with long-term conditions than among those without such conditions.

Among respondents without long-term health conditions, the harmonic time terms were jointly significant in the baseline model, , p<0.0001, and the sine coefficient was negative and statistically significant. However, after adjustment, the joint test was no longer statistically significant, p=0.1376, although the sine coefficient remained weakly significant. This suggests that the overall adjusted harmonic pattern was less robust among respondents without long-term health conditions.

Overall, Table S3 suggests that health-related characteristics may be associated with the robustness of time-of-response associations.

**Table S4 Pets-, friends-, relatives-, and children-stratified logistic regression analyses of time-of-response variation in loneliness reports using ONS Direct Measure.**

| **Subgroups** | |  | **Baseline model** | **Adjusted model** |
| --- | --- | --- | --- | --- |
| **Pets** | **With Pets**  **(N=26,102 VS 5,124)** | Cos24 | 0.002  (-0.04~0.04)  P=0.942 | -0.01  (-0.12,0.10)  P=0.827 |
| Sin24 | -0.12***  (-0.18 ~-0.07)  P<0.001 | -0.22**  (-0.36~-0.08)  P=0.002 |
| Joint significance | P<0.0001 | p=0.0043 |
| **Without pets**  **(N=38,931 VS 14,702)** | Cos24 | 0.01  (-0.03~0.04)  P=0.721 | 0.04  (-0.03,0.10)  P=0.272 |
| Sin24 | -0.11***  (-0.15~-0.07)  P<0.001 | -0.08*  (-0.17~-0.002)  P=0.044 |
| Joint significance | P<0.0001 | p=0.1210 |
| **Friends** | **0**  **(N=11,211 VS 1,786)** | Cos24 | -0.06  (-0.14~0.03)  P=0.201 | -0.11  (-0.35~0.13)  P=0.371 |
| Sin24 | -0.15  (-0.26~-0.04)  P=0.008 | -0.002  (-0.29~0.29)  P=0.989 |
| Joint significance | P=0.0030 | P=0.6560 |
| **1-2**  **(N=30,697 VS 4,943)** | Cos24 | -0.02  (-0.07~0.03)  P=0.485 | 0.01  (-0.13~0.14)  P=0.565 |
| Sin24 | -0.14***  (-0.20~-0.08)  P<0.001 | -0.24**  (-0.42~-0.06)  P=0.009 |
| Joint significance | P<0.0001 | P=0.0224 |
| **3 or more**  **(N=74,270 VS 13,091)** | Cos24 | -0.01  (-0.03~0.01)  P=0.384 | 0.04  (-0.02~0.11)  P=0.165 |
| Sin24 | -0.14***  (-0.20~-0.08)  P<0.001 | -0.09*  (-0.17~-0.01)  P=0.021 |
| Joint significance | P<0.0001 | P=0.0575 |
| **Relatives** | **0**  **(N=6,907 VS 1,649)** | Cos24 | -0.05  (-0.15~0.04)  P=0.274 | -0.01  (-0.24~0.21)  P=0.922 |
| Sin24 | -0.14*  (-0.26~-0.02)  P<0.026 | 0.04  (-0.23~0.31)  P=0.776 |
| Joint significance | P=0.0183 | P=0.9603 |
| **1-2**  **(N=30,799 VS 5,259)** | Cos24 | -0.01  (-0.06~0.03)  P=0.612 | 0.07  (-0.06~0.20)  P=0.306 |
| Sin24 | -0.10***  (-0.16~-0.05)  P<0.001 | -0.12  (-0.28~0.05)  P=0.163 |
| Joint significance | P=0.0005 | P=0.3187 |
| **3 or more**  **(N=78,478 VS 12,918)** | Cos24 | -0.01  (-0.03~0.01)  P=0.338 | 0.03  (-0.04~0.09)  P=0.393 |
| Sin24 | -0.10***  (-0.16~-0.05)  P<0.001 | -0.13**  (-0.21~-0.04)  P=0.002 |
| Joint significance | P<0.0001 | P=0.0096 |
| **Children** | **Without child**  **(N=37,796 VS 8,421)** | Cos24 | -0.02  (-0.06~0.02)  P=0.310 | 0.02  (-0.08~0.11)  P=0.686 |
| Sin24 | -0.09***  (-0.14~-0.04)  P<0.001 | -0.09  (-0.21~0.02)  P=0.125 |
| Joint significance | P<0.0001 | P=0.3051 |
| **With children**  **(N=76,613 VS 11,405)** | Cos24 | 0.004  (-0.02~0.03)  P=0.681 | 0.03  (-0.04~0.10)  P=0.396 |
| Sin24 | -0.10***  (-0.13~-0.07)  P<0.001 | -0.14**  (-0.23~-0.05)  P=0.002 |
| Joint significance | P<0.0001 | P=0.0095 |

Notes: 1) *P<0.05, **P<0.01, ***P<0.001. Coef., coefficient. 2) Sample sizes vary slightly between the ONS Direct Measure and UCLA-3 because valid responses were not available for exactly the same respondents. Subgroup denominators are therefore measure-specific.

Table S4 summarises pet-, friendship-, relative-, and children-stratified analyses using the ONS Direct Measure. Adjusted evidence varied across household and social-network groups.

Adjusted associations were more evident among respondents with pets, those reporting 1-2 friends, those reporting 3 or more relatives, and respondents with children.

Associations were weaker after adjustment among respondents without pets, those with no friends, and those with no or only 1-2 relatives.

The direction of association was generally consistent where adjusted evidence remained statistically supported.

Overall, Table S4 suggests exploratory heterogeneity across household and social-network subgroups.

**Table S5 Gender- and age-stratified logistic regression analyses of time-of-response variation in loneliness reports using UCLA-3 measure.**

| **Subgroups** | |  | **Baseline model** | **Adjusted model** |
| --- | --- | --- | --- | --- |
| **Gender** | **Male**  **(N=47,539 VS 8150)** | Cos24 | -0.004  (-0.03~0.03)  P=0.800 | 0.004  (-0.09~0.09)  P=0.931 |
| Sin24 | -0.12***  (-0.16~-0.09)  P<0.001 | -0.12*  (-0.23~-0.002)  P=0.046 |
| Joint significance | P<0.001 | P=0.1125 |
| **Female**  **(N=77,155 VS 11,576)** | Cos24 | -0.02  (-0.04~0.01)  P=0.144 | -0.04  (-0.11,0.04)  P=0.302 |
| Sin24 | -0.03*  (-0.06~-0.004)  P=0.023 | -0.15**  (-0.24~-0.06)  P=0.001 |
| Joint significance | P=0.0052 | p=0.0003 |
| **Age** | **Under 60**  **(N=115,380 VS 11,122)** | Cos24 | -0.01  (-0.03~0.01)  P=0.294 | -0.01  (-0.09~0.06)  P=0.734 |
| Sin24 | -0.09***  (-0.11~-0.06)  P<0.001 | -0.09  (-0.18~0.003)  P=0.043 |
| Joint significance | P<0.0001 | P=0.0726 |
| **Above 60 (N=10,590 VS 8,704)** | Cos24 | -0.02  (-0.08~0.05)  P=0.583 | -0.03  (-0.12~0.06)  P=0.485 |
| Sin24 | -0.16***  (-0.24~-0.08)  P<0.001 | -0.20**  (-0.31~-0.08)  P=0.001 |
| Joint significance | P=0.0001 | P=0.0003 |

Notes: 1) *P<0.05, **P<0.01, ***P<0.001. Coef., coefficient. 2) Sample sizes vary slightly between the ONS Direct Measure and UCLA-3 because valid responses were not available for exactly the same respondents. Subgroup denominators are therefore measure-specific.

**Table S5** summarises gender- and age-stratified analyses using the UCLA-3 measure. Adjusted evidence was stronger among women and respondents aged 60 years and above than among men and respondents aged under 60 years.

Full subgroup-specific estimates are shown in Table S5.

The UCLA-3 subgroup findings were broadly consistent with the ONS-based demographic analyses.

Overall, Table S5 suggests exploratory demographic heterogeneity in the time-of-response association.

**Table S6 Partner- and education-stratified logistic regression analyses of time-of-response variation in loneliness reports using the UCLA-3 measure.**

| **Subgroups** | |  | **Baseline model** | **Adjusted model** |
| --- | --- | --- | --- | --- |
| **Partner** | **Partnered**  **(N=34,903 VS 9,647)** | Cos24 | 0.03*  (0.0002, 0.07)  P=0.049 | 0.01  (-0.07,0.09)  P=0.849 |
| Sin24 | -0.11***  (-0.16, -0.07)  P<0.001 | -0.14**  (-0.25~-0.04)  p=0.007 |
| Joint significance | P<0.001 | p=0.0193 |
| **Not Partnered**  **(N=28,422 VS 9,635)** | Cos24 | -0.02  (-0.06~0.02)  P=0.431 | -0.06  (-0.15,0.02)  P=0.125 |
| Sin24 | -0.08**  (-0.13~-0.03)  P=0.002 | -0.11*  (-0.21~-0.01)  P=0.030 |
| Joint significance | P=0.0010 | p=0.0051 |
| **Education** | **Secondary**  **(N=17,679 VS 4,163)** | Cos24 | -0.01  (-0.06~0.04)  P=0.714 | -0.01  (-0.13~0.12)  P=0.927 |
| Sin24 | -0.12***  (-0.18~-0.06)  P<0.001 | -0.23**  (-0.40~-0.06)  P=0.009 |
| Joint significance | P=0.0002 | P=0.0183 |
| **College (N=18,925 VS 4,797)** | Cos24 | 0.02  (-0.03~0.06)  P=0.417 | -0.04  (-0.16~0.07)  P=0.479 |
| Sin24 | -0.07*  (-0.13~-0.01)  P=0.026 | 0.01  (-0.15~0.16)  P=0.948 |
| Joint significance | P=0.0841 | P=0.7601 |
| **University or higher (N=28,275 VS 10,866)** | Cos24 | -0.03  (-0.07~0.01)  P=0.096 | -0.02  (-0.10~0.06)  P=0.633 |
| Sin24 | -0.08**  (-0.13~-0.03)  P=0.001 | -0.17***  (-0.26~-0.08)  P<0.001 |
| Joint significance | P<0.0001 | P=0.0002 |
| **Employment** | **Unemployed**  **(N=31,516 VS 8,993)** | Cos24 | 0.001  (-0.03~0.04)  P=0.927 | -0.05  (-0.14~0.04)  P=0.260 |
| Sin24 | -0.08***  (-0.13~-0.04)  P<0.001 | -0.17**  (-0.27~-0.06)  P=0.003 |
| Joint significance | P<0.0001 | P=0.0006 |
| **Employed**  **(N=30,400 VS 10,237)** | Cos24 | -0.02  (-0.05~0.02)  P=0.300 | 0.01  (-0.07~0.08)  P=0.836 |
| Sin24 | -0.07**  (-0.12~-0.03)  P=0.002 | -0.11**  (-0.21~-0.02)  P=0.017 |
| Joint significance | P=0.0004 | P=0.0467 |

Notes: 1) *P<0.05, **P<0.01, ***P<0.001. Coef., coefficient. 2) Sample sizes vary slightly between the ONS Direct Measure and UCLA-3 because valid responses were not available for exactly the same respondents. Subgroup denominators are therefore measure-specific.

**Table S6** summarises partner-, education-, and employment-stratified analyses using the UCLA-3 measure. Adjusted evidence was retained in both partnership groups, among respondents with secondary or university-level education, and among both unemployed and employed respondents.

Among respondents without a partner, the harmonic time terms were also jointly significant in the baseline model, p=0.0010, and remained significant after adjustment, p=0.0051. The sine coefficient was negative in both models and remained statistically significant after adjustment. These results suggest that the time-of-response pattern in loneliness reports was not limited to partnered respondents, but was also evident among those who were without a partner.

Evidence was weaker among respondents with college-level education.

Among respondents with university education or higher, the harmonic time terms were jointly significant in the baseline model, , p<0.0001, and remained significant after adjustment, p=0.0002. The sine coefficient was negative and statistically significant in both models, with a larger magnitude after adjustment. This indicates that the adjusted time-of-response pattern was clearly evident among respondents with university-level education or higher.

Employment-stratified results suggested that the association was present in both unemployed and employed respondents, although adjusted evidence was weaker among employed respondents.

Overall, Table S6 suggests exploratory heterogeneity across partnership, education, and employment groups.

**Table S7 Disability- and long-term health conditions-stratified logistic regression analyses of time-of-response variation in loneliness reports using UCLA-3 measure.**

| **Subgroups** | |  | **Baseline model** | **Adjusted model** |
| --- | --- | --- | --- | --- |
| **Disability** | **Disability**  **(N=23,213 VS 3,149)** | Cos24 | -0.001  (-0.05~0.05)  P=0.967 | -0.04  (-0.19,0.12)  P=0.654 |
| Sin24 | -0.11***  (-0.17 ~-0.06)  P<0.001 | -0.30**  (-0.51~-0.08)  P=0.006 |
| Joint significance | P=0.0002 | p=0.0068 |
| **No disability**  **(N=87,915 VS 15,900)** | Cos24 | -0.02  (-0.05~-0.003)  P=0.024 | -0.005  (-0.07,0.06)  P=0.883 |
| Sin24 | -0.08***  (-0.11~-0.05)  P<0.01 | -0.12**  (-0.20~-0.04)  P=0.002 |
| Joint significance | P<0.0001 | p=0.0037 |
| **Long term health conditions** | **With long-term health conditions**  **(N=57,251 VS 8,255)** | Cos24 | -0.01  (-0.04~0.01)  P=0.302 | -0.03  (-0.17~0.06)  P=0.577 |
| Sin24 | -0.07  (-0.11~-0.03)  P<0.001 | -0.15  (-0.26~-0.03)  P=0.011 |
| Joint significance | P<0.0001 | P=0.0132 |
| **Without long-term health conditions**  **(N=54,484 VS 10,881)** | Cos24 | -0.02  (-0.05~0.01)  P=0.151 | -0.03  (-0.10~0.05)  P=0.456 |
| Sin24 | -0.10***  (-0.14~-0.07)  P<0.001 | -0.12**  (-0.21~-0.03)  P=0.009 |
| Joint significance | P<0.0001 | P=0.0073 |

Notes: 1) *P<0.05, **P<0.01, ***P<0.001. Coef., coefficient. 2) Sample sizes vary slightly between the ONS Direct Measure and UCLA-3 because valid responses were not available for exactly the same respondents. Subgroup denominators are therefore measure-specific.

Table S7 summarises disability- and long-term health-condition-stratified analyses using the UCLA-3 measure. Adjusted evidence was retained among respondents with and without disability and among those with and without long-term health conditions.

The direction of association was broadly consistent across health-condition subgroups.

Long-term health-condition-stratified analyses showed a similar pattern. Among respondents with long-term health conditions, the harmonic time terms were jointly significant in the baseline model, , p<0.0001, and remained significant after covariate adjustment, p=0.0132. The sine coefficient was negative in both models and remained statistically significant after adjustment, suggesting a persistent time-of-response pattern among respondents with long-term health conditions.

Overall, Table S7 suggests that time-of-response associations were evident across health-related subgroups, with subgroup differences remaining exploratory.

**Table S8 Pets-, friends-, relatives-, and children-stratified logistic regression analyses of time-of-response variation in loneliness reports using UCLA-3 measure.**

| **Subgroups** | |  | **Baseline model** | **Adjusted model** |
| --- | --- | --- | --- | --- |
| **Pets** | **With Pets**  **(N=26,102 VS 5,124)** | Cos24 | -0.002  (-0.04~0.05)  P=0.908 | 0.004  (-0.11,0.12)  P=0.942 |
| Sin24 | -0.12***  (-0.18 ~-0.07)  P<0.001 | -0.19**  (-0.33~-0.04)  P=0.012 |
| Joint significance | P=0.0217 | p=0.0303 |
| **Without pets**  **(N=38,931 VS 14,702)** | Cos24 | 0.01  (-0.05~0.02)  P=0.388 | -0.03  (-0.09,0.04)  P=0.429 |
| Sin24 | -0.10***  (-0.14~-0.06)  P<0.001 | -0.12**  (-0.20~-0.04)  P=0.004 |
| Joint significance | P<0.0001 | p=0.0023 |
| **Friends** | **0**  **(N=11,211 VS 1,792)** | Cos24 | -0.09*  (-0.17~-0.01)  P=0.019 | 0.01  (-0.19~0.22)  P=0.909 |
| Sin24 | -0.09  (-0.17~0.05)  P=0.058 | -0.12  (-0.39~0.15)  P=0.389 |
| Joint significance | P=0.0015 | P=0.6815 |
| **1-2**  **(N=30,697 VS 4,943)** | Cos24 | -0.03  (-0.07~0.02)  P=0.192 | 0.01  (-0.11~0.134)  P=0.892 |
| Sin24 | -0.07**  (-0.12~-0.02)  P=0.004 | -0.17*  (-0.32~-0.02)  P=0.027 |
| Joint significance | P=0.0012 | P=0.0706 |
| **3 or more**  **(N=74,270 VS 13,091)** | Cos24 | -0.02*  (-0.05~-0.001)  P=0.041 | -0.01  (-0.08~0.05)  P=0.719 |
| Sin24 | -0.07***  (-0.10~-0.04)  P<0.001 | -0.12**  (-0.20~-0.04)  P=0.005 |
| Joint significance | P<0.0001 | P=0.0069 |
| **Relatives** | **0**  **(N=6,907 VS 1,649)** | Cos24 | -0.01  (-0.10~0.07)  P=0.777 | -0.02  (-0.23~0.18)  P=0.837 |
| Sin24 | -0.20***  (-0.31~-0.09)  P<0.001 | -0.08  (-0.33~0.17)  P=0.548 |
| Joint significance | P=0.0004 | P=0.7696 |
| **1-2**  **(N=30,799 VS 5,259)** | Cos24 | -0.03  (-0.07~0.01)  P=0.184 | 0.05  (-0.06~0.17)  P=0.372 |
| Sin24 | -0.07**  (-0.12~-0.02)  P=0.007 | -0.06  (-0.21~0.08)  P=0.401 |
| Joint significance | P=0.0020 | P=0.5818 |
| **3 or more**  **(N=78,478 VS 12,918)** | Cos24 | -0.03**  (-0.05~-0.01)  P=0.012 | -0.04  (-0.11~0.03)  P=0.297 |
| Sin24 | -0.07***  (-0.10~-0.04)  P<0.001 | -0.16**  (-0.25~-0.08)  P<0.001 |
| Joint significance | P<0.0001 | P<0.0001 |
| **Children** | **Without child**  **(N=37,800 VS 8,421)** | Cos24 | -0.05**  (-0.08~-0.01)  P=0.006 | 0.03  (-0.06~0.11)  P=0.575 |
| Sin24 | -0.08***  (-0.13~-0.04)  P<0.001 | -0.14*  (-0.24~-0.03)  P=0.013 |
| Joint significance | P<0.0001 | P=0.0419 |
| **With children**  **(N=76,613 VS 11,405)** | Cos24 | -0.001  (-0.02~0.02)  P=0.960 | -0.05  (-0.12~0.03)  P=0.220 |
| Sin24 | -0.07***  (-0.10~-0.05)  P<0.001 | -0.14**  (-0.24~-0.05)  P=0.003 |
| Joint significance | P<0.0001 | P=0.0008 |

Notes: 1) *P<0.05, **P<0.01, ***P<0.001. Coef., coefficient. 2) Sample sizes vary slightly between the ONS Direct Measure and UCLA-3 because valid responses were not available for exactly the same respondents. Subgroup denominators are therefore measure-specific.

Table S8 summarises pet-, friendship-, relative-, and children-stratified analyses using the UCLA-3 measure. Adjusted evidence was retained across several household and social-network subgroups.

Adjusted evidence was clearest among respondents with larger friendship networks, although patterns differed by social-network category.

Relatives-stratified results suggested stronger adjusted evidence among respondents reporting 3 or more relatives.

Children-stratified results suggested adjusted evidence among respondents both with and without children.

Overall, Table S8 suggests exploratory heterogeneity across household and social-tie subgroups.
