# Supplementary material
Source: Research Square preprint supplement (doi:10.21203/rs.3.rs-10082747/v1)
Supplement: Supplementary file 2 [file 4eba39d4ea8488e4109a5f25.docx]

**Supplementary Appendix 2**

**Figure S1 Predicted probability of loneliness reports in the adjusted model using ONS Direct Measure**


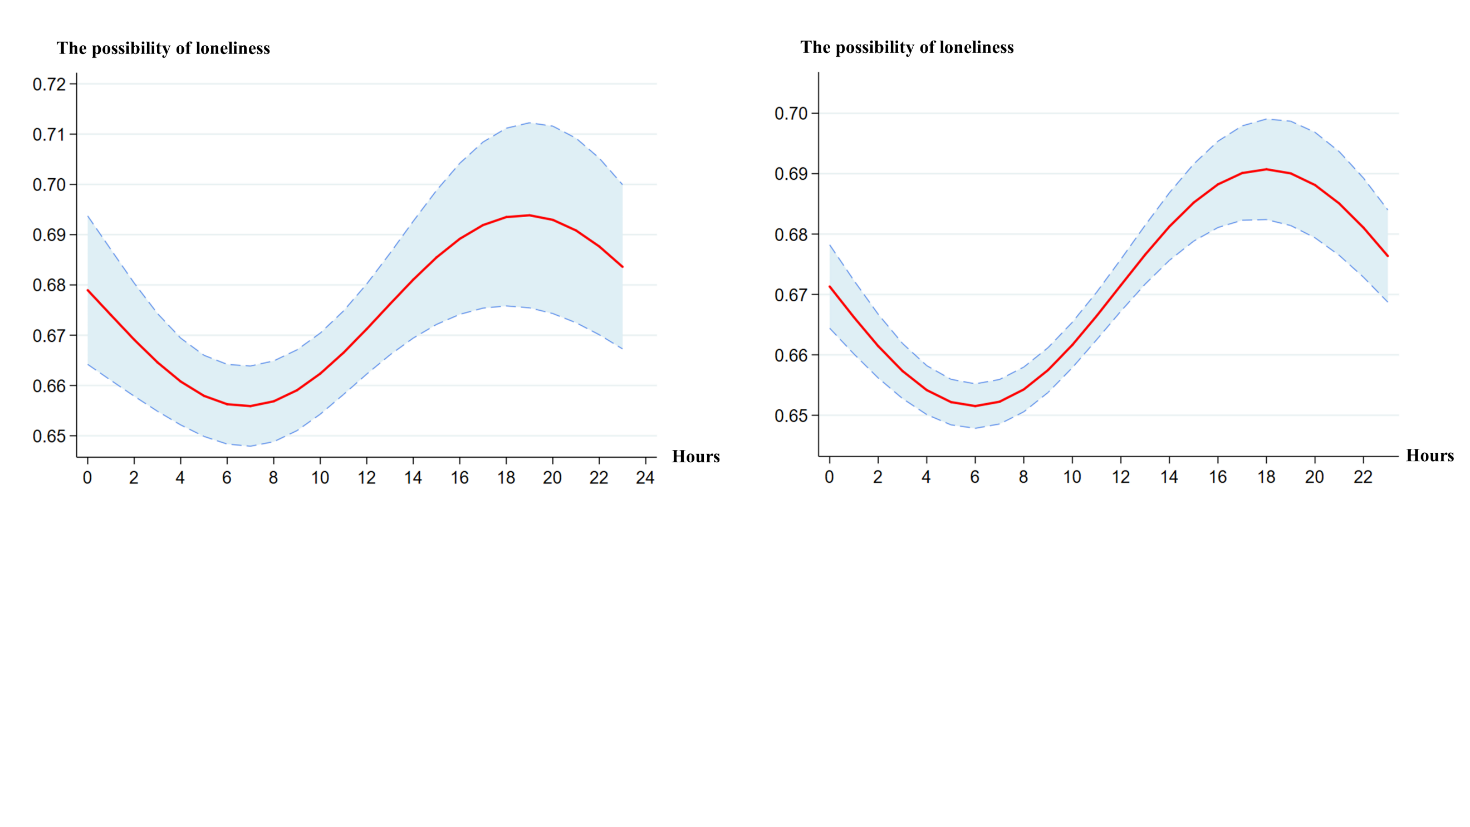


**Figure S1** shows adjusted model-based predicted probabilities for the ONS Direct Measure. Predictions were estimated for each hour using the adjusted harmonic regression model.

For the ONS Direct Measure, the adjusted predicted probability was lowest at 07:00 (0.656) and highest at 19:00 (0.694), with a peak-to-trough difference of approximately 3.8 percentage points.

The baseline and adjusted ONS curves showed similar timing and magnitude, suggesting that the time-of-response association remained after covariate adjustment.

**Figure S2 Predicted probability of loneliness in the adjusted model using UCLA-3 measure**


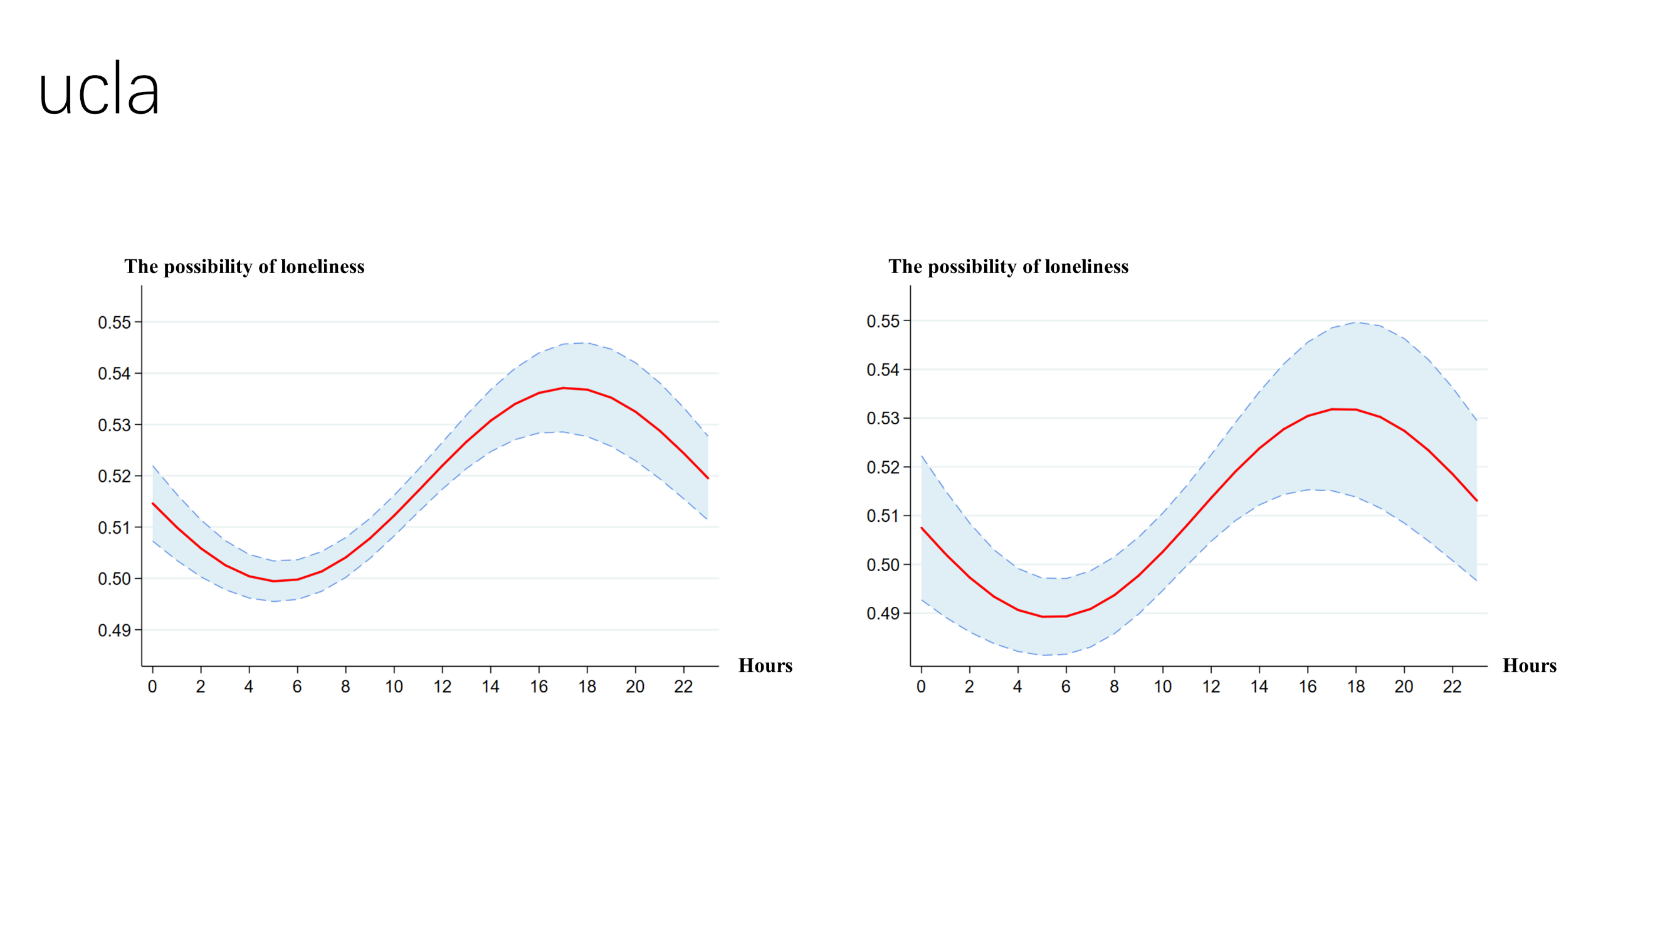


**Figure S2** shows the predicted loneliness curve based on the adjusted harmonic logistic regression model. In the adjusted model, the predicted probability was again lowest at approximately 05:00, with a predicted probability of 0.49, and highest at approximately 17:00, with a predicted probability of 0.53. The adjusted model therefore also showed a peak-to-trough difference of approximately 4 percentage points.

For UCLA-3-defined loneliness, the adjusted predicted probability was lowest for early-morning responses and highest for late-afternoon responses. The adjusted pattern was similar to the baseline model.
