# Supplementary material
Source: Research Square preprint supplement (doi:10.21203/rs.3.rs-10082747/v1)
Supplement: Supplementary file 3 [file 9c14acb031f7e0fb341deac5.docx]

**Supplementary File 1**

**Supplementary File 1**

**Calculation of hourly loneliness proportions and confidence intervals**

For each hour , we calculated the number of valid observations , and the mean of the binary loneliness indicator:

=

wheredenotes the loneliness status of respondent in hour . if the respondent was classified as lonely and otherwise. Because the loneliness variable was binary, the hourly mean is equivalent to the proportion of respondents reporting loneliness in that hour. Thus, each point in the hourly plot represents the observed proportion of valid respondents classified as lonely within that survey-start hour, rather than the response of any single individual.

To quantify statistical uncertainty around the hourly proportions, we estimated approximate standard errors using the binomial formula:

and calculated approximate 95% confidence intervals as:

Confidence intervals were bounded within the logical range of 0 to 1.
